# Supplementary material for: A Novel Weighted Fractional GM(1,1) Model and Its Applications
Source: Hindawi journal article supplement (doi:10.1155/2020/6570683), 2020-01-20
Supplement: f1 [file 6570683.f1.zip]

Archive with 3 entries (3 files):
- 6570683.f1/mainprogram.docx
- 6570683.f1/WFGM.docx
- 6570683.f1/WFGM_QPSO.docx
