# Supplementary material for: A Novel Weighted Fractional GM(1,1) Model and Its Applications
Source: Hindawi journal article supplement (doi:10.1155/2020/6570683), 2020-01-20
Supplement: f1 [file 6570683.f1.zip › 6570683.f1/mainprogram.docx]

clc;

clear;

format short

Example = input('Choose Exmaple: ');

if Example == 1

x0 = [1066.9 1157.6 1286 1477.1 1695.2 1913 2180.6 2482.2 2607.6 2781.7 3134.8 3497.0 3684.2 3993 4132.9 4231];

t = 13;

elseif Example == 2

x0 = [8881 9609 11061 13652 17167 18742 20948 22232 23709 25774 27589 28850]; % t=8

t = 8;

elseif Example == 3

x0 = [35 41.5 49.3 58.6 69.2 80.3 85.2 94.8 103.1 107.2 119.3];

t = 7;

elseif Example ==4

x0 = [76807.70 96031.10 116463.30 137217.86 160366.06 176713.40 180757.47 193566.78 213943.56 235085.53];

t = 6;

end

n = length(x0); % Compute the length of the data sequence

fprintf('Fitting and predicting by the WFGM(1,1) model\n')

populmax1 = 1; populmin1 = 0;

populmax2 = 1; populmin2 = 0;

dimensions = 2;

maxgen = 500;

popsize = 5;

[gbestfit_WFGM,lambda_WFGM,r_WFGM] = WFGM_QPSO (maxgen, popsize, dimensions, populmax1, populmin1, populmax2, populmin2, x0, t, n);

fprintf('Quasi-optimal parameters for WFGM(1,1) are: lambda %1.4f, r %1.4f\n', lambda_WFGM, r_WFGM);

xWFGM = WFGM(x0(1:t), n, t, lambda_WFGM, r_WFGM);

epsilon_Fitness_xWFGM = (abs(xWFGM(1:t)-x0(1:t))./x0(1:t))*100;

MAPE_Fitness_xWFGM = sum(epsilon_Fitness_xWFGM)/t;

fprintf('Fitting MAPE for WFGM(1,1) is %1.4f\n', MAPE_Fitness_xWFGM)

epsilon_Predict_xWFGM = (abs(xWFGM(t+1:n)-x0(t+1:n))./x0(t+1:n))*100;

MAPE_Predict_xWFGM = sum(epsilon_Predict_xWFGM)/(n-t);

fprintf('Prediction MAPE for WFGM(1,1) is %1.4f\n',MAPE_Predict_xWFGM)
