# Supplementary material for: A Novel Weighted Fractional GM(1,1) Model and Its Applications
Source: Hindawi journal article supplement (doi:10.1155/2020/6570683), 2020-01-20
Supplement: f1 [file 6570683.f1.zip › 6570683.f1/WFGM.docx]

function x0_WFGM = WFGM(x0,n,t,lambda,r)

% Input : x0 - data sequence

% n - total length of the input data

% t - data length used for fitting

% lambda - weight

% r - fractional order

% Output : x0_WFGM - predicted data

% Construct weighted fractional acumulation matrix A

d(1) = 1;

for i = 2:n

d(i) = d(i-1)*lambda*(r+i-2)/(i-1);

end

for i=1:n

A(i:n,i) = d(1:n-i+1);

end

% Data preprocess

x1 = A(1:t,1:t)*x0';

% Compute background values

z1 = 0.5*(x1(2:t)+x1(1:t-1));

% Compute the development coefficient and the grey input action

B = [-z1 ones(t-1,1)];

Y=x1(2:t)-x1(1:t-1);

p = (B'*B)\(B'*Y);

a = p(1); b = p(2);

% Compute the constant for whitenization equation based on initial condition

c = exp(a)*(x0(1)-b/a);

% Compute the predicted value

hatx1 = c*exp(-a.*(1:n))+b/a;

x0_WFGM = A\hatx1';

x0_WFGM = x0_WFGM';

return
