# Supplementary material for: A Novel Weighted Fractional GM(1,1) Model and Its Applications
Source: Hindawi journal article supplement (doi:10.1155/2020/6570683), 2020-01-20
Supplement: f1 [file 6570683.f1.zip › 6570683.f1/WFGM_QPSO.docx]

function [gbestfit,lambda,r] = WFGM_QPSO(maxgen,popsize,dimensions,populmax1,populmin1,populmax2,populmin2,x0,t,n)

% Input : maxgen - largest iteration number

% popsize - number of discrete particles

% dimensions - number of parameters

% populmax1 - upper bound of the parameter lambda

% populmin1 - lower bound of the parameter lambda

% populmax2 - upper bound of the parameter r

% populmin2 - lower bound of the parameter r

% x0 - data sequence

% t - data length used for fitting

% n - total length of the input data

%Output : gbestfit - best fitting error

% lambda - quasi-optimal weight

% r - quasi-optimal fractional order

% Setting bounds for parameters

populmax = [populmax1,populmax2];

populmin = [populmin1,populmin2];

% Initializing discrete particles

popul1 = rand(1,popsize)*(populmax(1)-populmin(1))+populmin(1);

popul2 = rand(1,popsize)*(populmax(2)-populmin(2))+populmin(2);

popul = [popul1',popul2']';

% Fitting the data sequence with initial discrete particles

for m = 1:popsize

xNFGM = WFGM(x0(1:t),n,t,popul(1,m),popul(2,m));

fitness(m) = sum((abs(xNFGM(1:t)-x0(1:t))./x0(1:t))*100)/t;

end

% Initializing parameters

ibestpos = popul; % Initializing individual best position

ibestfit = fitness; % Fittness of each individual

[fbestpart,g] = min(ibestfit); % The best global fit

gbestfit = fbestpart;

gbestpos = ibestpos(:,g); % The optimal parameters correspond to the best global fittness

for count = 1:maxgen

for m = 1:popsize

xNFGM = WFGM(x0(1:t),n,t,popul(1,m),popul(2,m));

fitness(m) = sum((abs(xNFGM(1:t)-x0(1:t))./x0(1:t))*100)/t;

if fitness(m)<ibestfit(m);

ibestfit(m) = fitness(m);

ibestpos(:,m) = popul(:,m);

end

end

m_best = sum(ibestpos)/popsize;

[fbestpart,g] = min(fitness); % Update global history best position

if fbestpart < gbestfit

gbestfit = fbestpart;

gbestpos = popul(:,g);

end

bestfitness(count) = gbestfit;% The optimal fitness for each iteration

% update the position

W(count) = 0.5-0.5*(maxgen-count)/maxgen;

for j = 1:popsize

for i = 1:dimensions

f = rand;

pp = f*ibestpos(i,j)+(1-f)*gbestpos(i)';

u = rand;

if u > 0.5

popul(i,j) = pp-W(count)*abs(m_best(1,j)-popul(i,j))*log(1/u);

else

popul(i,j) = pp+W(count)*abs(m_best(1,j)-popul(i,j))*log(1/u);

end

if popul(i,j) > populmax(i)

popul(i,j) = rand*(populmax(i)-populmin(i))+populmin(i);

elseif popul(i,j) < populmin(i)

popul(i,j) = rand*(populmax(i)-populmin(i))+populmin(i);

end

end

end

end

lambda = gbestpos(1);

r = gbestpos(2);

return
